# Supplementary material for: Unusual Association of NF-κB Components in Tumor-Associated Macrophages (TAMs) Promotes HSPG2-Mediated Immune-Escaping Mechanism in Breast Cancer
Source: Int J Mol Sci. 2022 Jul 18;23(14):7902. doi: 10.3390/ijms23147902 (PMC9324337; doi:10.3390/ijms23147902)
Supplement: Supplementary file 1 [file ijms-23-07902-s001.zip › ijms-1819739-supplementary.pdf]

## Supplementary Material

### Unusual association of NF- $\kappa$ B components in tumor associated macrophages (TAMs) promotes HSPG2-mediated immune-escaping mechanism in breast cancer

Veronica De Paolis<sup>1</sup>, Fabio Maiullari<sup>2,3</sup>, Maila Chirivi<sup>4,5</sup>, Marika Milan<sup>2,5</sup>, Chiara Cordiglieri<sup>2</sup>, Francesca Pagano<sup>1</sup>, Alessandra Rita La Manna<sup>6</sup>, Elena De Falco<sup>7,8</sup>, Claudia Bearzi<sup>2,9</sup>, Roberto Rizzi<sup>2,7\*</sup> and Chiara Parisi<sup>1\*</sup>

<sup>1</sup> Institute of Biochemistry and Cell Biology, National Research Council of Italy (IBBC-CNR), Via Ercole Ramarini, 32, Monterotondo, 00015 Rome, Italy; veronica.depaolis@ibbc.cnr.it (V.D.P.); francesca.pagano@cnr.it (F.P.)

<sup>2</sup> Fondazione Istituto Nazionale di Genetica Molecolare, Via F. Sforza, 35, 20122 Milan, Italy; maiullari@ingm.org (F.M.); marika.milan@policlinico.mi.it (M.M.); cordiglieri@ingm.org (C.C.); claudia.bearzi@itb.cnr.it (C.B.)

<sup>3</sup> PhD Program in Cellular and Molecular Biology, Department of Biology, University of Rome "Tor Vergata", Via della Ricerca Scientifica, 1, 00133 Rome, Italy

<sup>4</sup> Department of Molecular Medicine Sapienza University, Viale Regina Elena, 324, 00161 Rome, Italy; maila.chirivi@uniroma1.it

<sup>5</sup> UOC Neurology, Fondazione Ca'Granda, Ospedale Maggiore Policlinico, Via F. Sforza, 28, 20122 Milan, Italy

<sup>6</sup> Breast Unit, Department of General Surgery, Santa Maria Goretti Hospital, via Guido Reni snc, Azienda Unità Sanitaria Locale (AUSL), 04100 Latina, Italy

<sup>7</sup> Department of Medical Surgical Sciences and Biotechnologies, Sapienza University of Rome, C.so della Repubblica, 79, 04100 Latina, Italy; elena.defalco@uniroma1.it

<sup>8</sup> Clinica Mediterranea Cardiocentro, Via Orazio, 2, 80122 Napoli, Italy

<sup>9</sup> Institute for Biomedical Technologies, National Research Council, Via Fratelli Cervi, 93, 20054 Segrate, Italy

\* Correspondence: roberto.rizzi@uniroma1.it (R.R.); chiara.parisi@cnr.it (C.P.)

† These authors equally contributed to this work.

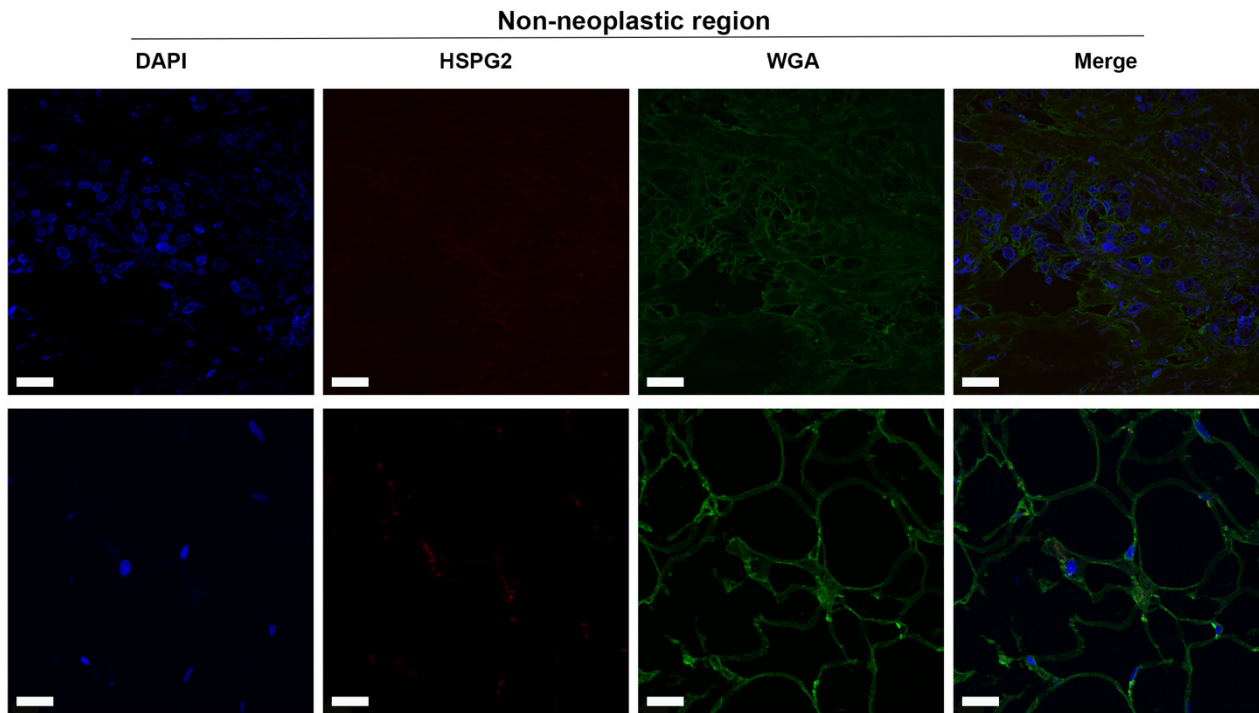

**Supplementary Figure S1.** HSPG2 staining in non-neoplastic region. Immunofluorescence analysis of HSPG2 was performed in the surrounding non-neoplastic region of TNBC biopsies. HSPG2 was stained in red, while tissue section was detected in green with WGA. Nuclei were counterstained with Dapi. Scale bars represent 40  $\mu\text{m}$ . The representative images derived from qualitative analysis of TNBC biopsies of  $n = 3$  patients.
